# Supplementary material
Source: PubMed Central journal article supplement (PMC6299110)
Supplement: 41396_2018_262_MOESM1_ESM.pdf [file 41396_2018_262_MOESM1_ESM.pdf]

## Supplemental Table and Figures

**Table S1** Sequencing results detailing type of sequencing conducted, collection time, volume filtered per sample (liters), number of reads sequenced per sample, and the number of reads after trimming which were used for subsequent analysis.

| Sample | SeqType    | Date      | Time  | Volume Filtered [L] | Reads       | Trimmed     |
|--------|------------|-----------|-------|---------------------|-------------|-------------|
| SM001  | Selected   | 26-Jul-15 | 22:00 | 18.5                | 82,804,818  | 80,868,600  |
| SM002  | Selected   | 27-Jul-15 | 2:00  | 20.0                | 104,412,586 | 102,065,024 |
| SM003  | Selected   | 27-Jul-15 | 6:00  | 19.0                | 95,321,226  | 93,338,226  |
| SM004  | Selected   | 27-Jul-15 | 10:00 | 19.0                | 101,136,891 | 98,987,416  |
| SM005  | Selected   | 27-Jul-15 | 14:00 | 19.0                | 91,209,079  | 89,152,418  |
| SM006  | Selected   | 27-Jul-15 | 14:00 | 19.5                | 84,332,817  | 82,459,267  |
| SM007  | Selected   | 27-Jul-15 | 14:00 | 20.0                | 84,649,327  | 82,770,017  |
| SM008  | Selected   | 27-Jul-15 | 18:00 | 19.0                | 77,185,948  | 76,157,781  |
| SM009  | Selected   | 27-Jul-15 | 22:00 | 19.0                | 71,403,462  | 70,265,212  |
| SM010  | Selected   | 28-Jul-15 | 2:00  | 20.0                | 90,686,522  | 89,385,823  |
| SM011  | Selected   | 28-Jul-15 | 6:00  | 19.0                | 71,052,838  | 70,077,820  |
| SM012  | Selected   | 28-Jul-15 | 10:00 | 19.5                | 85,443,334  | 83,990,646  |
| SM013  | Selected   | 28-Jul-15 | 14:00 | 19.0                | 91,287,548  | 90,174,268  |
| SM014  | Selected   | 28-Jul-15 | 14:00 | 19.0                | 82,959,687  | 81,784,036  |
| SM015  | Selected   | 28-Jul-15 | 14:00 | 20.0                | 77,105,700  | 75,833,575  |
| SM016  | Selected   | 28-Jul-15 | 18:00 | 19.0                | 100,054,397 | 98,675,685  |
| SM017  | Selected   | 28-Jul-15 | 22:00 | 19.5                | 80,015,073  | 78,875,883  |
| SM018  | Selected   | 29-Jul-15 | 2:00  | 20.0                | 80,508,121  | 79,402,387  |
| SM019  | Selected   | 29-Jul-15 | 6:00  | 19.5                | 97,723,236  | 96,416,134  |
| SM020  | Selected   | 29-Jul-15 | 10:00 | 19.5                | 99,883,736  | 97,936,288  |
| SM021  | Selected   | 29-Jul-15 | 14:00 | 15.0                | 96,373,025  | 94,638,953  |
| SM022  | Selected   | 29-Jul-15 | 14:00 | 18.5                | 103,302,918 | 100,929,460 |
| SM023  | Selected   | 29-Jul-15 | 14:00 | 17.5                | 99,055,311  | 97,500,687  |
| SM024  | Selected   | 29-Jul-15 | 18:00 | 18.5                | 82,011,783  | 80,787,557  |
| SM025  | Selected   | 29-Jul-15 | 22:00 | 19.0                | 92,091,844  | 90,638,583  |
| SM026  | Selected   | 30-Jul-15 | 2:00  | 19.5                | 90,895,258  | 89,302,208  |
| SM027  | Selected   | 30-Jul-15 | 6:00  | 20.5                | 75,012,386  | 73,971,764  |
| SM058  | Unselected | 26-Jul-15 | 22:00 | 18.5                | 74,540,622  | 72,160,026  |
| SM059  | Unselected | 27-Jul-15 | 2:00  | 20.0                | 86,358,595  | 83,636,076  |
| SM060  | Unselected | 27-Jul-15 | 6:00  | 19.0                | 75,257,788  | 73,018,472  |
| SM061  | Unselected | 27-Jul-15 | 10:00 | 19.0                | 72,991,024  | 70,971,759  |
| SM062  | Unselected | 27-Jul-15 | 14:00 | 19.0                | 73,221,112  | 71,151,117  |
| SM063  | Unselected | 27-Jul-15 | 14:00 | 19.5                | 79,961,867  | 77,677,292  |
| SM064  | Unselected | 27-Jul-15 | 14:00 | 20.0                | 83,949,968  | 81,343,374  |
| SM065  | Unselected | 27-Jul-15 | 18:00 | 19.0                | 72,412,581  | 70,526,818  |
| SM066  | Unselected | 27-Jul-15 | 22:00 | 19.0                | 75,376,085  | 73,532,572  |
| SM067  | Unselected | 28-Jul-15 | 2:00  | 20.0                | 78,755,369  | 76,252,256  |
| SM068  | Unselected | 28-Jul-15 | 6:00  | 19.0                | 68,593,488  | 66,271,491  |
| SM069  | Unselected | 28-Jul-15 | 10:00 | 19.5                | 68,000,244  | 65,942,879  |
| SM070  | Unselected | 28-Jul-15 | 14:00 | 19.0                | 81,040,846  | 78,694,156  |
| SM071  | Unselected | 28-Jul-15 | 14:00 | 19.0                | 68,243,422  | 65,993,473  |
| SM072  | Unselected | 28-Jul-15 | 14:00 | 20.0                | 73,252,707  | 70,920,519  |
| SM073  | Unselected | 28-Jul-15 | 18:00 | 19.0                | 67,006,815  | 64,845,754  |
| SM074  | Unselected | 28-Jul-15 | 22:00 | 19.5                | 72,409,848  | 70,096,636  |
| SM075  | Unselected | 29-Jul-15 | 2:00  | 20.0                | 64,544,561  | 62,300,869  |
| SM076  | Unselected | 29-Jul-15 | 6:00  | 19.5                | 71,849,541  | 69,420,309  |
| SM077  | Unselected | 29-Jul-15 | 10:00 | 19.5                | 68,078,147  | 65,471,742  |
| SM078  | Unselected | 29-Jul-15 | 14:00 | 15.0                | 79,561,871  | 76,737,855  |
| SM079  | Unselected | 29-Jul-15 | 14:00 | 18.5                | 72,277,327  | 69,748,299  |
| SM080  | Unselected | 29-Jul-15 | 14:00 | 17.5                | 84,657,570  | 81,819,135  |
| SM081  | Unselected | 29-Jul-15 | 18:00 | 18.5                | 62,659,289  | 60,038,409  |
| SM082  | Unselected | 29-Jul-15 | 22:00 | 19.0                | 73,364,717  | 70,718,059  |
| SM083  | Unselected | 30-Jul-15 | 2:00  | 19.5                | 71,056,308  | 68,421,257  |
| SM084  | Unselected | 30-Jul-15 | 6:00  | 20.5                | 74,987,106  | 72,365,506  |

**Figure S1** Scale independence and mean connectivity plots of variance stabilized count data for *Rhizosolenia* and *Richelia* transcript abundances. A soft-thresholding power of 7 was chosen for construction of gene networks and identifying modules for WGCNA.

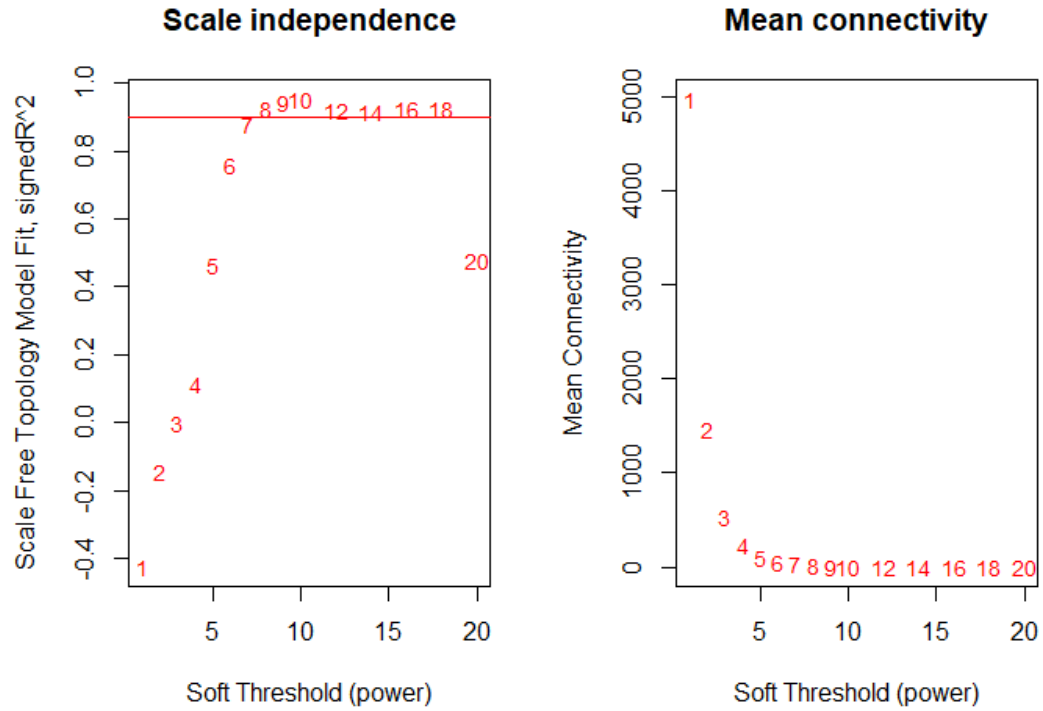

**Figure S2** Surface abundance (15 m) of *nifH* gene copies per liter belonging to major groups of diazotrophic cyanobacteria. The het-1 group contains *Richelia* (*Rhizosolenia* associated). For methods and bulk trends see Wilson et al. (1). Here UCYN and het data were separated to highlight *Richelia* (*Rhizosolenia*-associated) presence.

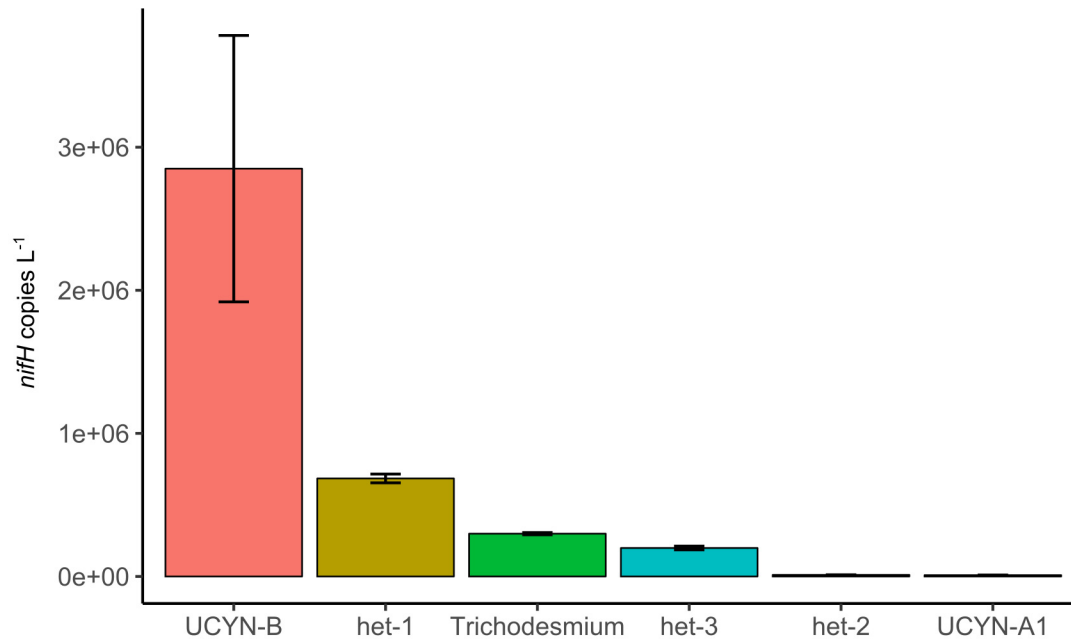

**Figure S3** Hierarchically clustered heat map of *Rhizosolenia* genes that were significantly periodic (RAIN, FDR < 0.05) where red indicates the maximum normalized expression (row max) and blue indicates the minimum normalized expression (row min) for that row (contig). Grey bars below the figure indicate dark periods (7 pm to 6 am) while yellow indicates light periods (6 am to 7 pm).

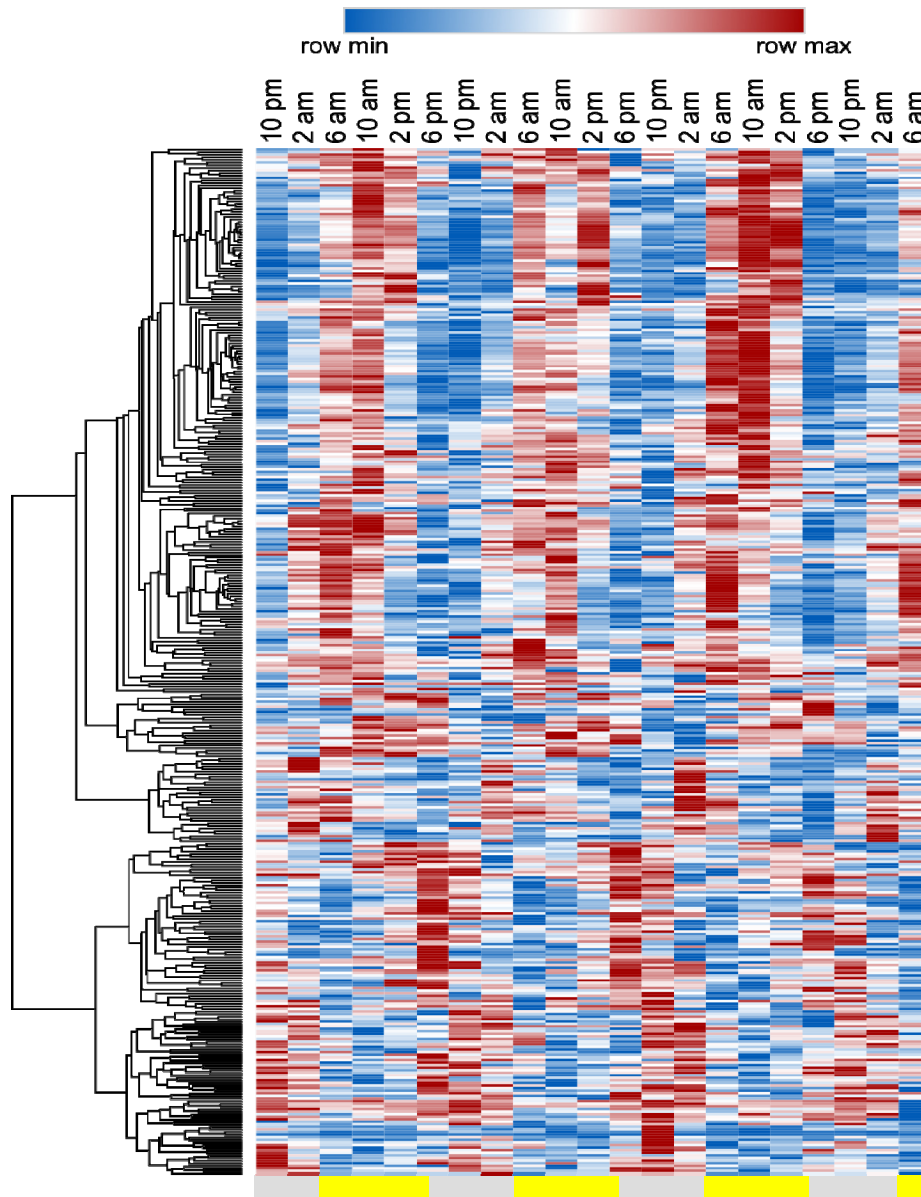

**Figure S4** Normalized expression patterns of the significantly diel genes involved in photosynthesis and carbon fixation in *Rhizosolenia*. Forty-three chlorophyll *a/b* binding proteins are represented as an average in plot A (SE  $\pm$  0.13). Gray shading highlights dark hours (7 pm to 6 am) while light periods are white (6 am to 7 pm).

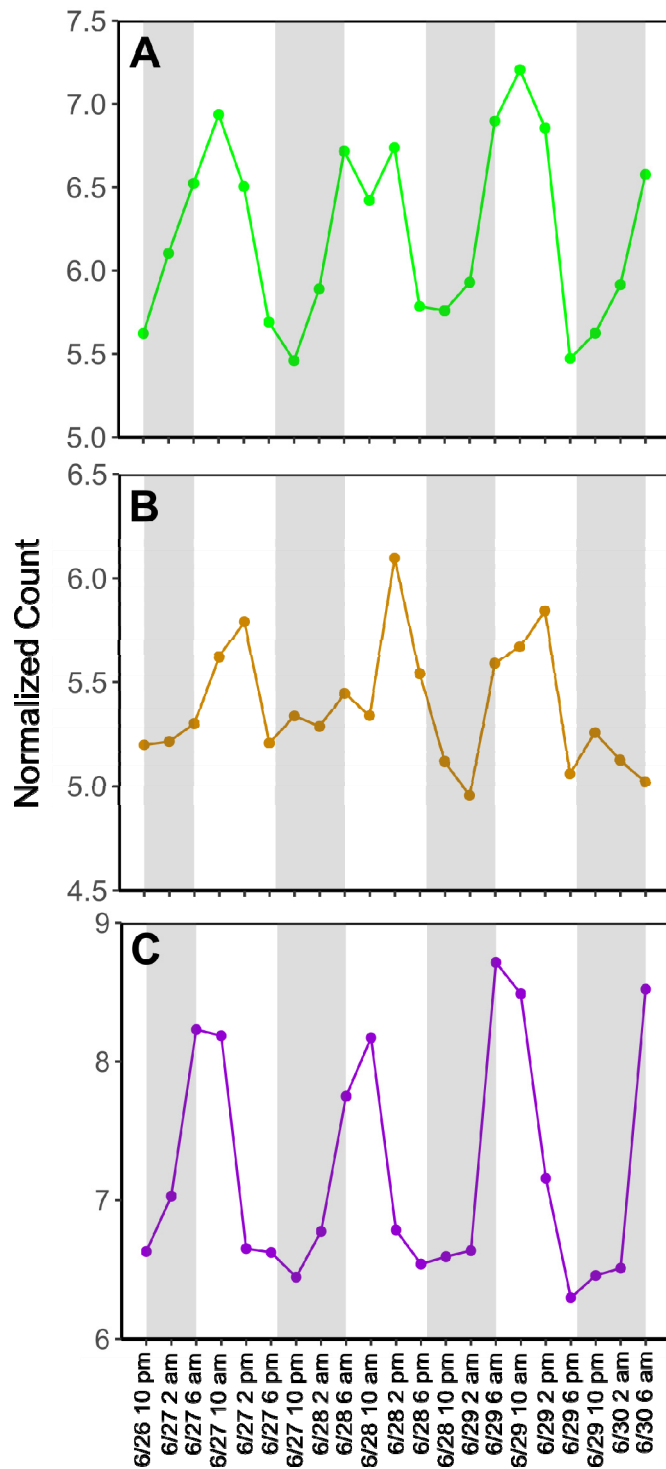

**Figure S5** The distribution of features (gene or contig) for each species in each WGCNA module.

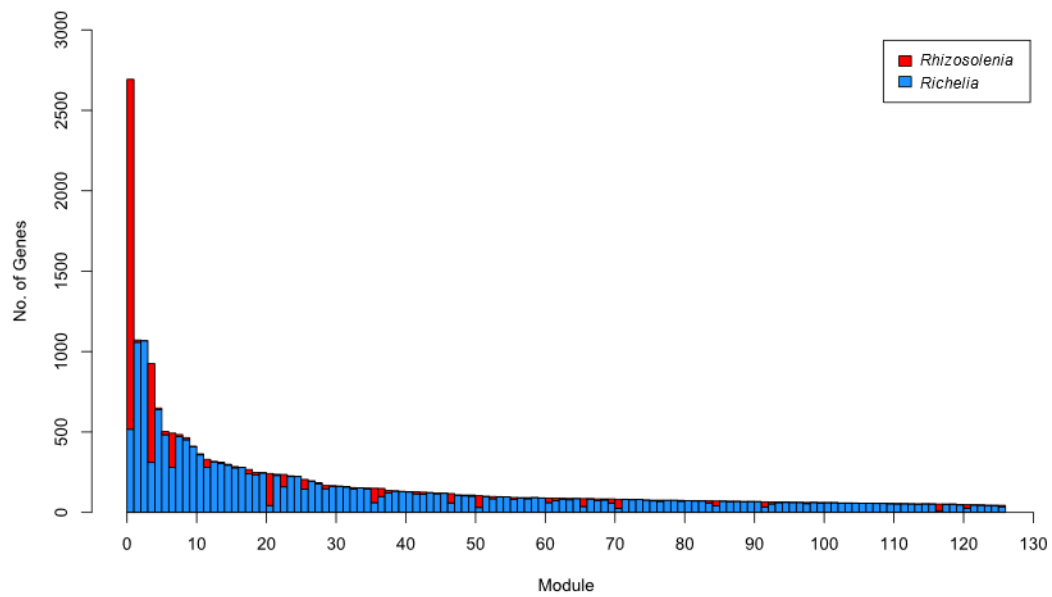

**Figure S6** Average normalized expression patterns of features within the WGCNA module 6 for *Richelia* (63 genes,  $SE \pm 0.28$ ) and *Rhizosolenia* (680 contigs,  $SE \pm 0.17$ ). Gray shading highlights dark hours (7 pm to 6 am) while light periods are white (6 am to 7 pm).

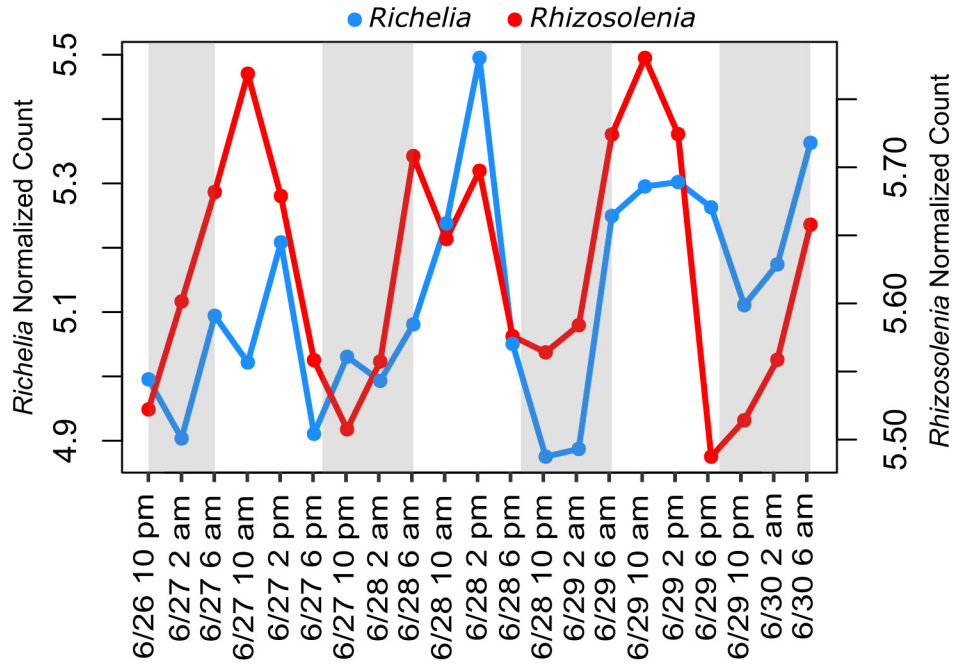

**Figure S7** Normalized expression patterns of silicic acid transport genes in *Rhizosolenia* with significant periodic expression (RAIN, FDR < 0.05). Gray shading highlights dark hours (7 pm to 6 am) while light periods are white (6 am to 7 pm).

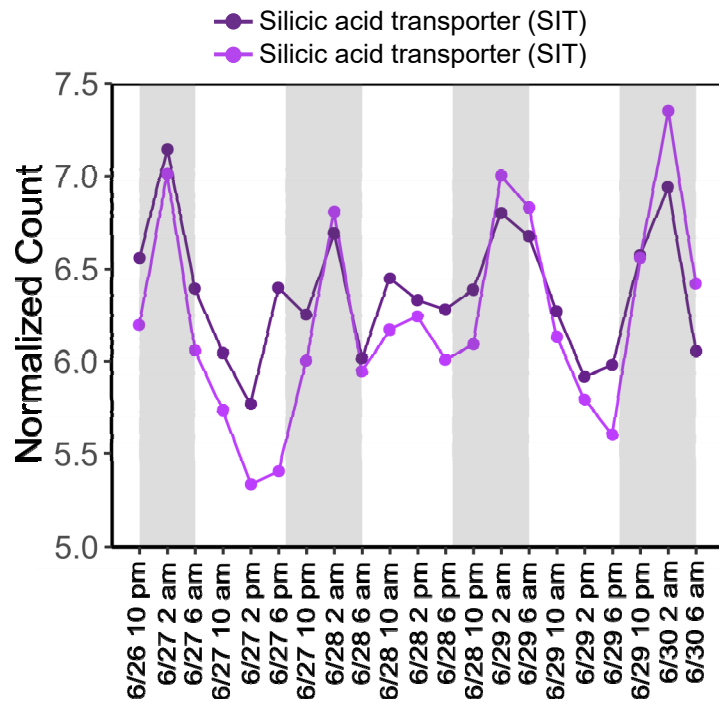

**Figure S8** Normalized expression patterns of A) putative nitrogen and carbon transporters in *Rhizosolenia* and B) a TRAP solute receptor in *Richelia*. TRAP = tripartite ATP-independent periplasmic and MFS = major facilitator superfamily. Gray shading highlights dark hours (7 pm to 6 am) while light periods are white (6 am to 7 pm).

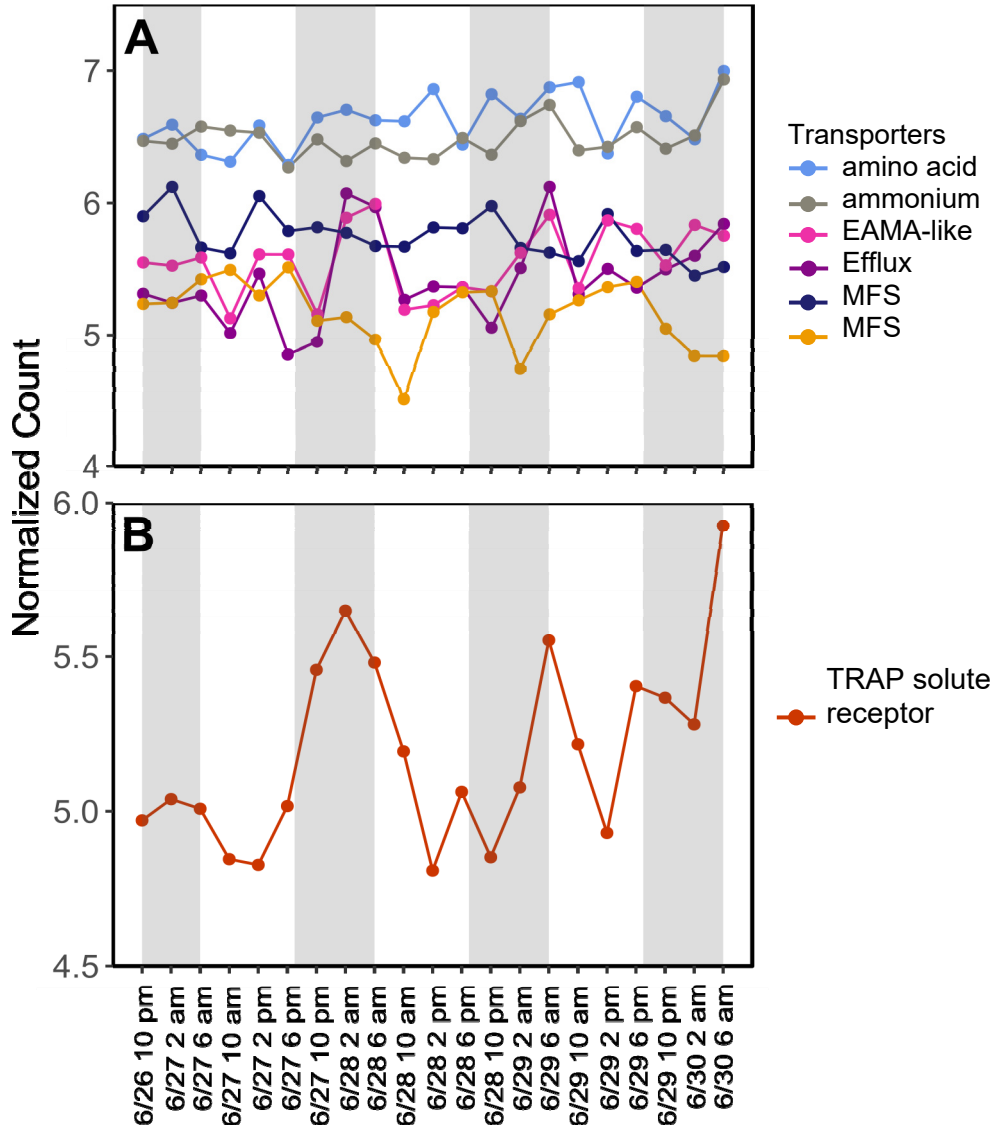

## References

1. Wilson ST, Aylward FO, Ribalet F, Barone B, Casey JR, Connell PE, et al. Coordinated regulation of growth, activity and transcription in natural populations of the unicellular nitrogen-fixing cyanobacterium *Crocospaera*. Nat Microbiol. 2017; **2**: 17118.
